# Supplementary material for: Effect of COVID-19 on liver abnormalities: a systematic review and meta‐analysis
Source: PubMed Central journal article supplement (PMC8134580; doi:10.1038/s41598-021-89513-9), 2021-05-19

# **Effect of COVID-19 on Liver Abnormalities: A Systematic review and Meta-analysis**

Khalid Bzeizi, FRCP, MD <sup>1\*</sup>, Maheeba Abdulla, MD <sup>2</sup>, Nafeesa Mohammed, MD <sup>3</sup>, Jihad Alqamish, MD <sup>4</sup>, Negar Jamshidi, PhD <sup>5</sup>, Dieter Broering, MD, PhD, FEBS, FACS<sup>6</sup>

<sup>1</sup>Department of Liver Transplantation, King Faisal Specialist Hospital & Research Center, P.O. Box 3354, Riyadh 11211, Saudi Arabia

<sup>2,3</sup>Internal Medicine Department, Salmaniya Medical Complex, Manama, Bahrain

<sup>4</sup>Ibn AlNafees Hospital, Manama, Bahrain

<sup>5</sup>School of Science, RMIT University, Melbourne, VIC 3000, Australia

<sup>6</sup>AlFaisal University, Organ Transplant Center & Department of Surgery, King Faisal Specialist Hospital & Research Centre (Gen. Org) MBC 96, P.O. Box 3354, Riyadh 11211, Saudi Arabia

**Running title:** Liver and Covid-19

**\*Corresponding author:**

Dr Khalid Bzeizi

Department of Liver Transplantation, King Faisal Specialist Hospital & Research Center,  
P.O. Box 3354, Riyadh 11211, Saudi Arabia

T: +966115576162

Email: [kbzeizi@kfshrc.edu.sa](mailto:kbzeizi@kfshrc.edu.sa)

## Sensitivity analysis

(Supplementary Figure S1).

### Alanine aminotransferase (ALT)

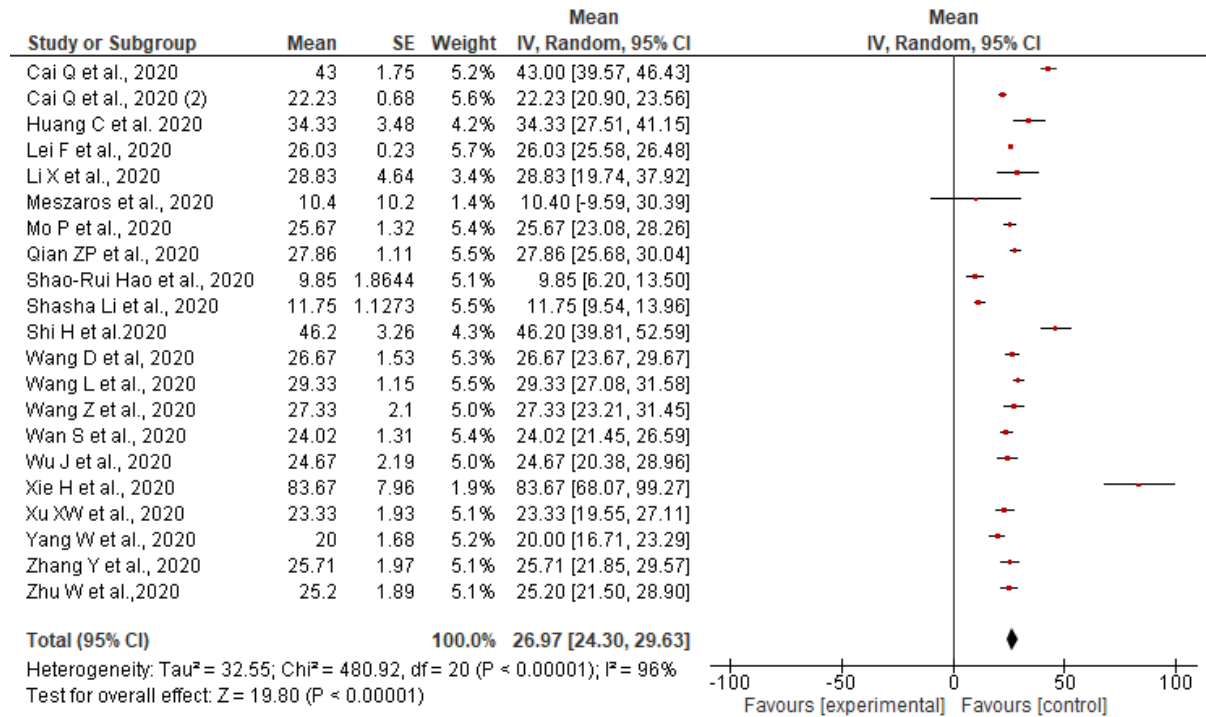

(Supplementary Figure S2).

**Aspartate aminotransferase (AST)**

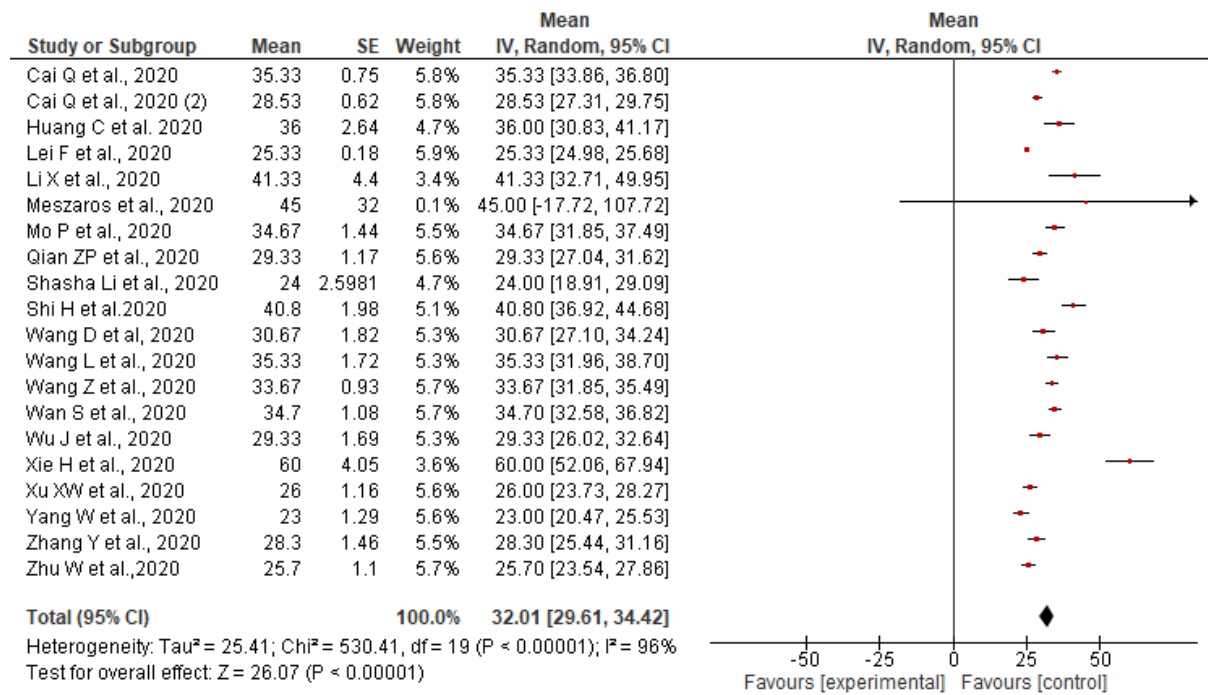

(Supplementary Figure S3).

### Total Bilirubin (TB)

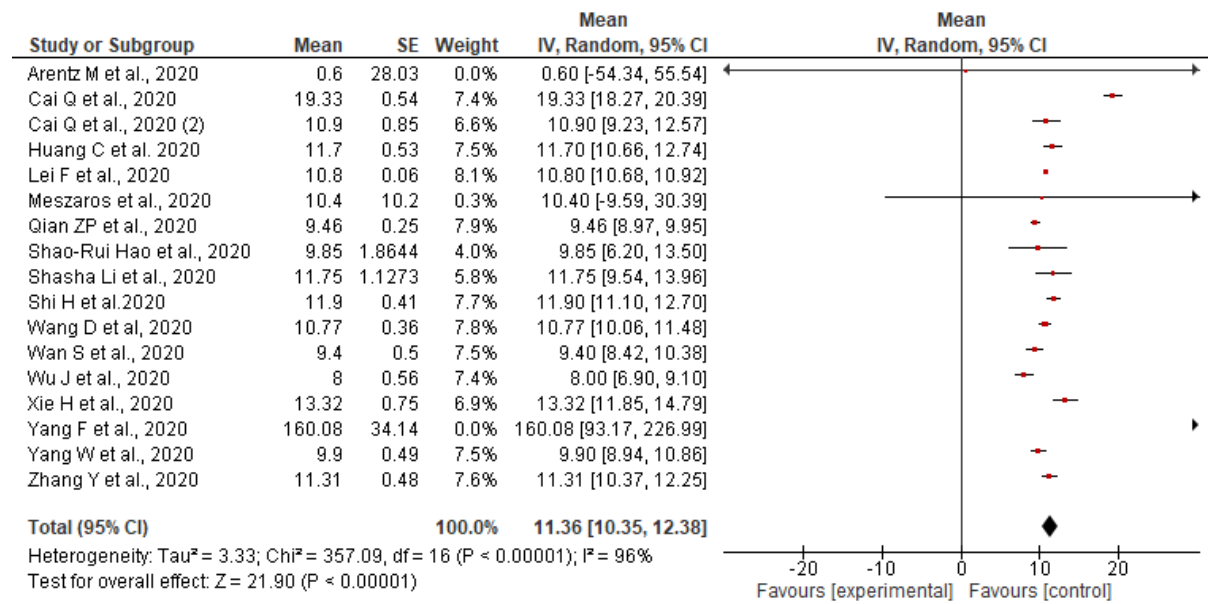

(Supplementary Figure S4).

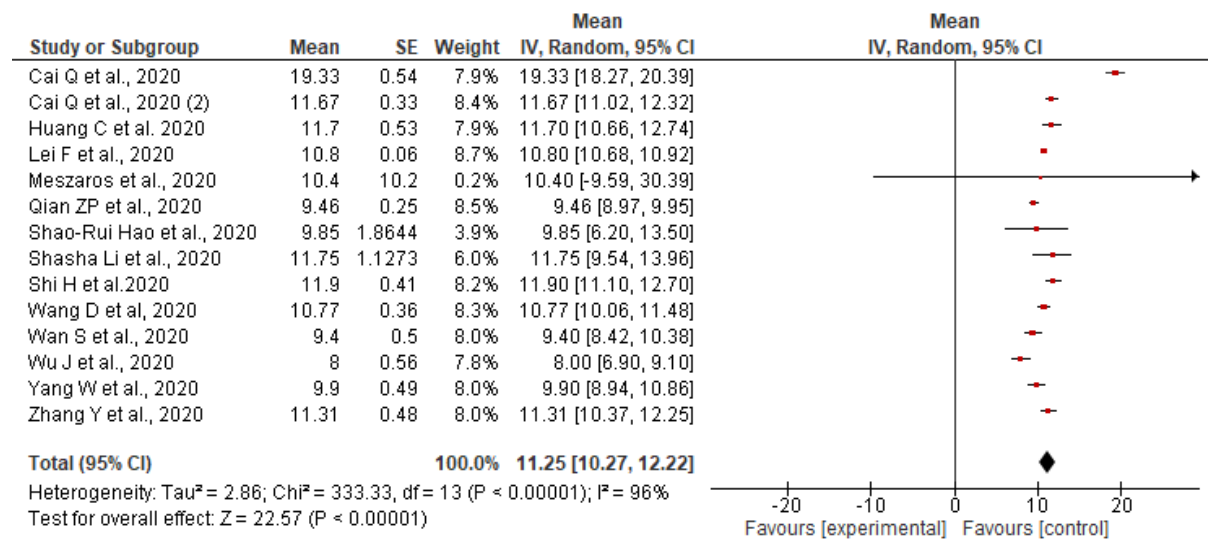

Supplement: 41598_2021_89513_MOESM2_ESM.pdf [file 41598_2021_89513_MOESM2_ESM.pdf]
